# Supplementary material for: Sleeve gastrectomy improves lipid dysmetabolism by downregulating the USP20-HSPA2 axis in diet-induced obese mice
Source: Front Endocrinol (Lausanne). 2022 Dec 27;13:1041027. doi: 10.3389/fendo.2022.1041027 (PMC9831654; doi:10.3389/fendo.2022.1041027)
Supplement: Supplementary file 2 [file Table_1.xlsx]

## Sheet: Sheet1
Supplementary table S1. A list of primary antibodies used in the study
Antibody	Supplier	Catalog No.	Application	Usage
Mouse anti-Flag	Sigma	F3165	WB, IF, IP	1:1000 for WB, 1:200 for IF and IP
Rabbit anti-Myc	Proteintech	16286-1-AP	WB, IF, IP	1:1000 for WB, 1:200 for IF and IP
Rabbit anti-HA	Proteintech	51064-2-AP	WB, IP	1:1000 for WB, 1:200 for IP
Rabbit anti-USP20	Proteintech	17491-1-AP	WB, IP，IHC	1:1000 for WB, 1:200 for IP and IHC
Rabbit anti-HSPA2	Proteintech	2797-1-AP	WB, IP，IHC	1:1000 for WB, 1:200 for IP and IHC
Mouse anti-Actin	Proteintech	66009-1-Ig	WB	1:1000 for WB
